# Supplementary material for: Prevalence and Persistence of Multidrug-Resistant Yersinia enterocolitica 4/O:3 in Tonsils of Slaughter Pigs from Different Housing Systems in Croatia
Source: MDPI journal article supplement (doi:10.3390/foods11101459), 2022-05-18
Supplement: s1 [file s1]

**Table S1.** Tonsil sampling scheme in slaughtered fattening pigs from different farm types.

| Slaughterhouse | Farm type         | Farm biosecurity category | Number of sampled pigs (tonsils) | Number of sampled retail meat |
|----------------|-------------------|---------------------------|----------------------------------|-------------------------------|
| 1              | Big integrated    | 3                         | 20                               | 12                            |
|                | Big integrated    | 3                         | 21                               |                               |
|                | Big integrated    | 3                         | 28                               |                               |
| 2              | Medium-sized      | 3                         | 13                               | 30                            |
|                | Medium-sized      | 3                         | 13                               |                               |
|                | Medium-sized      | 3                         | 12                               |                               |
|                | Medium-sized      | 3                         | 12                               |                               |
|                | Medium-sized      | 3                         | 12                               |                               |
|                | Medium-sized      | 2                         | 12                               |                               |
| 3              | Medium-sized      | 3                         | 7                                | 10                            |
|                | Small family farm | 2                         | 2                                |                               |
|                | Small family farm | 2                         | 2                                |                               |
|                | Small family farm | 2                         | 2                                |                               |
|                | Small family farm | 2                         | 3                                |                               |
|                | Small family farm | 2                         | 3                                |                               |
|                | Small family farm | 3                         | 2                                |                               |
|                | Medium-sized      | 3                         | 3                                | 10                            |
|                | Small family farm | 2                         | 3                                |                               |
|                | Small family farm | 3                         | 3                                |                               |
|                | Small family farm | 2                         | 2                                |                               |
|                | Small family farm | 1                         | 1                                |                               |
|                | Small family farm | 2                         | 2                                |                               |
|                | Small family farm | 2                         | 5                                |                               |
|                | Medium-sized      | 2                         | 4                                |                               |
|                | Small family farm | 2                         | 5                                |                               |
| 4              | Medium-sized*     | 3                         | 21                               | 30                            |
|                | Medium-sized*     | 3                         | 21                               |                               |

\*one single farm
